# Supplementary material
Source: publisher figshare collection journal article supplement (https://acs.figshare.com/ndownloader/files/6964325)
Supplement: Supplementary file 1 [file 6964325]

## Supporting Information

# Dopamine Modified Organic-inorganic Hybrid Coating for Anti-microbial and Osteogenesis

*Man Li<sup>a</sup>, Xiangmei Liu<sup>a</sup>, Ziqiang Xu<sup>a</sup>, K.W. K. Yeung<sup>b,c</sup>, Shuilin Wu<sup>a\*</sup>*

<sup>a</sup> Hubei Collaborative Innovation Center for Advanced Organic Chemical Materials, Ministry-of-Education Key Laboratory for the Green Preparation and Application of Functional Materials, Hubei Key Laboratory of Polymer Materials, School of Materials Science & Engineering, Hubei University, Wuhan 430062, China

<sup>b</sup> Division of Spine Surgery, Department of Orthopaedics & Traumatology, Li Ka Shing Faculty of Medicine, The University of Hong Kong, Pokfulam, Hong Kong, China

<sup>c</sup> Shenzhen Key Laboratory for Innovative Technology in Orthopaedic Trauma, The University of Hong Kong Shenzhen Hospital, 1 Haiyuan 1st Road, Futian District, Shenzhen, China

\* To whom correspondence should be addressed:

E-mail: [shuilin.wu@gmail.com](mailto:shuilin.wu@gmail.com) or [shuilin.wu@hubu.edu.cn](mailto:shuilin.wu@hubu.edu.cn) (SL Wu);

Tel: +86-27-88661729 and Fax: +86-27-88665610 (SL Wu)

## **Table of contents in supporting information**

1. Self-assemble process of PDA on Ti. (Figure S-1)
2. The EDS examination of calcium phosphate minerals on polydopamine modified Ti substrate. (Figure S-2)
3. EDX analysis of Ag doped on the surface of HA (Figure S-3)
4. Molecular structure of chitosan. (Figure S-4)
5. FTIR analysis of chitosan coating on the surface of the sample. (Figure S-5)
6. *In vitro* *E. coli* and *S. aureus* antibacterial activity of different coatings (mean  $\pm$  SD, n = 3). (Figure S-6)
7. Fluorescence microscopic images of *E. coli* on samples. (Figure S-7)
8. Fluorescence microscopic images of *S. aureus* on samples. (Figure S-8)

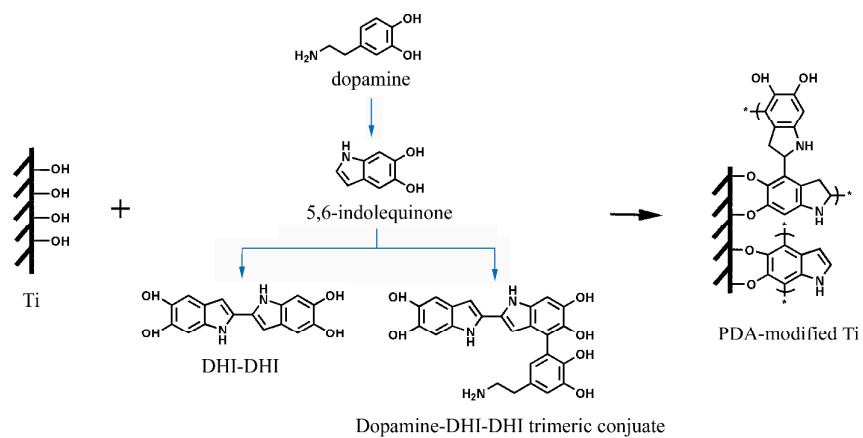

**Figure S1**

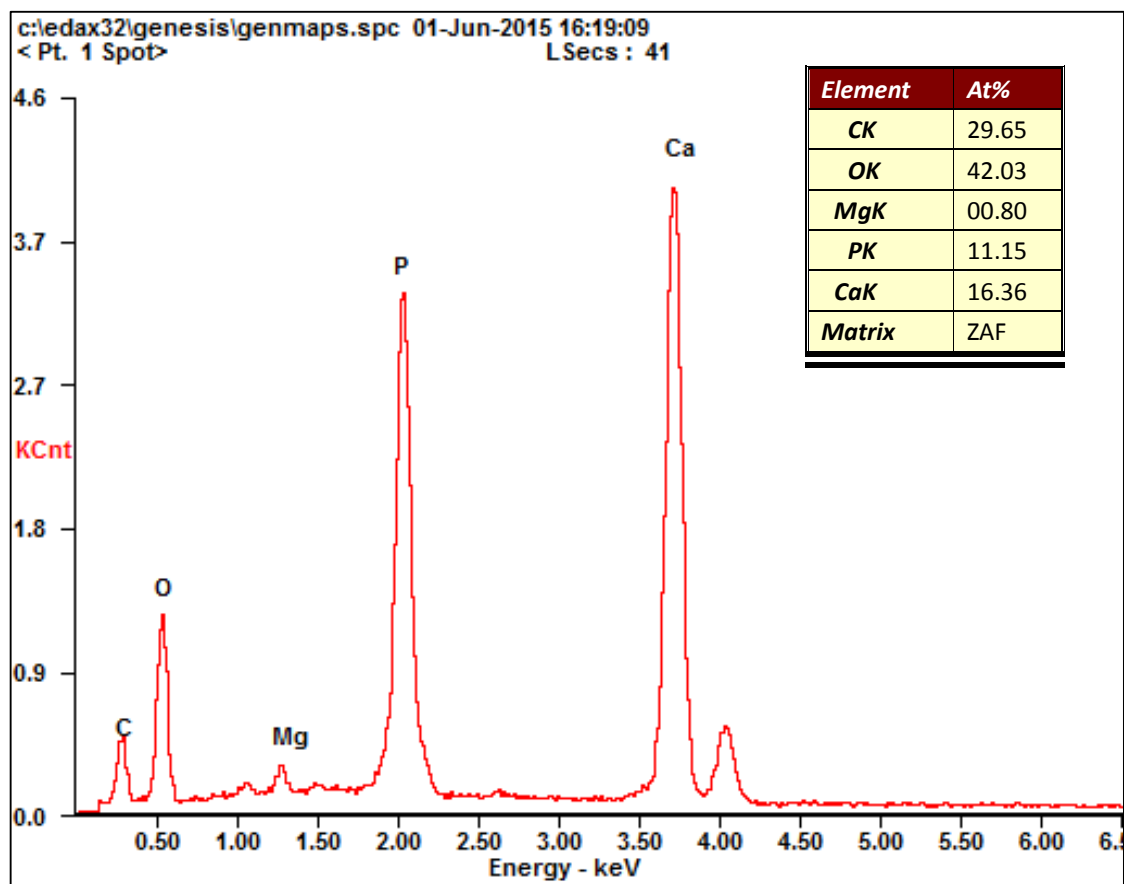

Figure S2

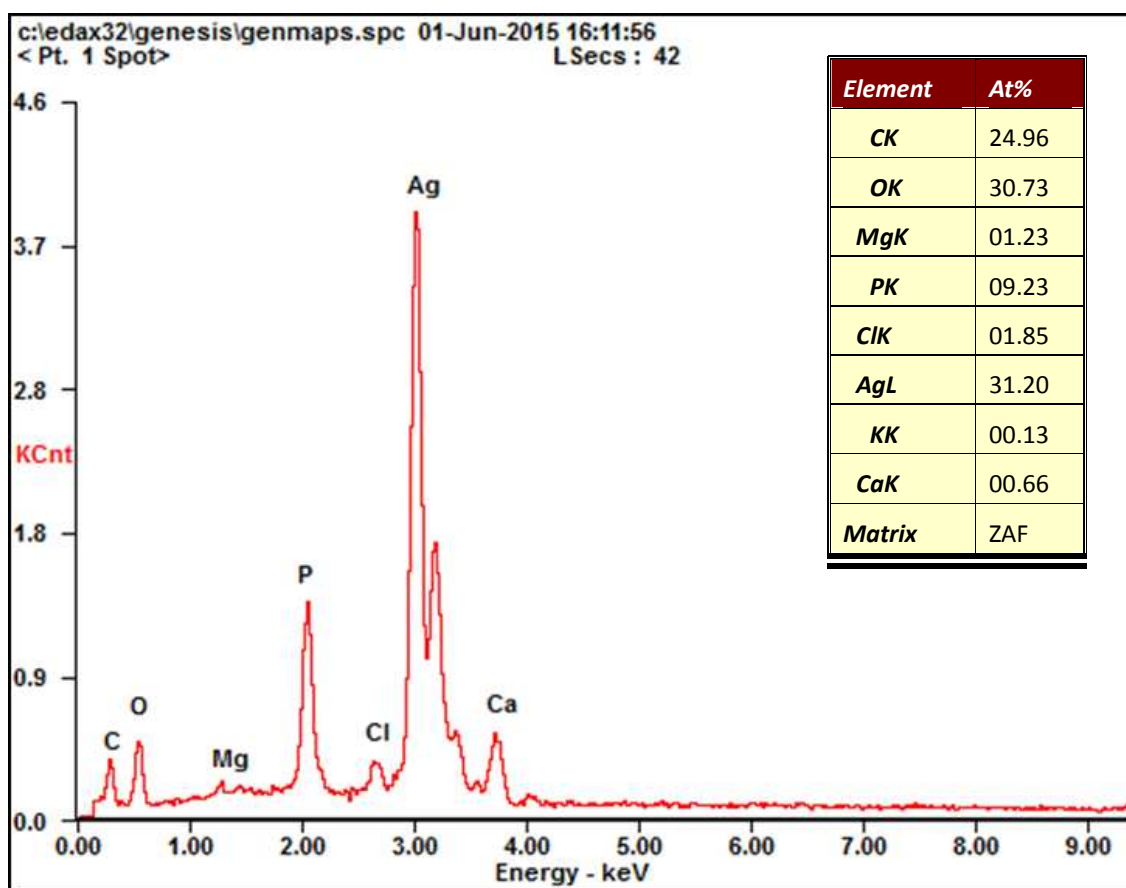

Figure S3

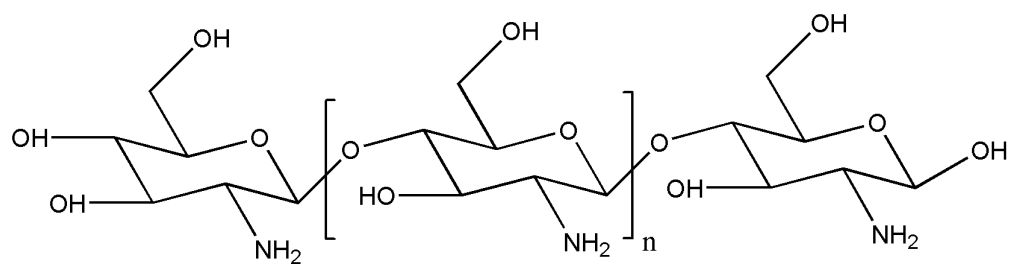

**Figure S4**

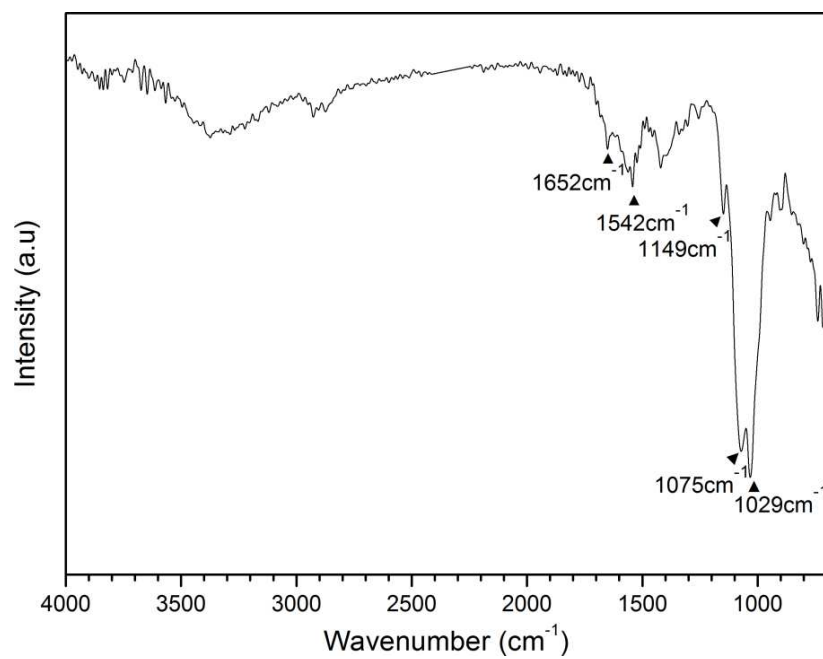

**Figure S5**

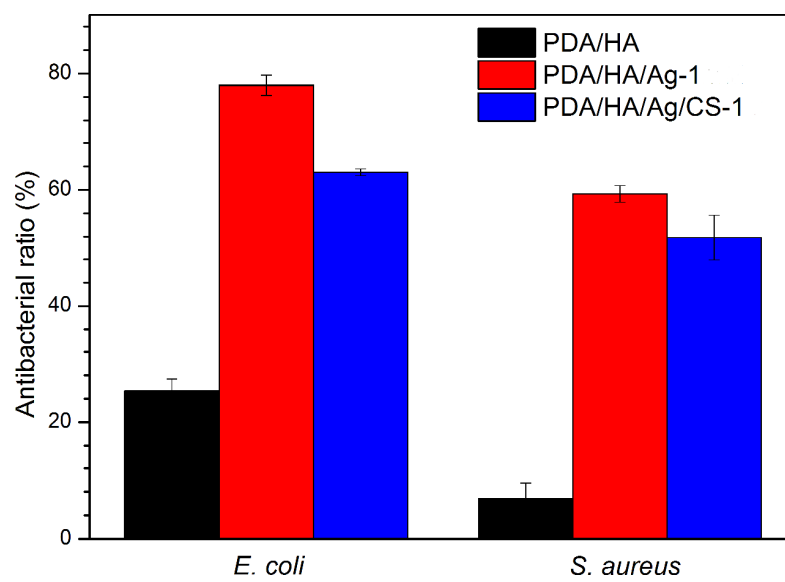

**Figure S6**



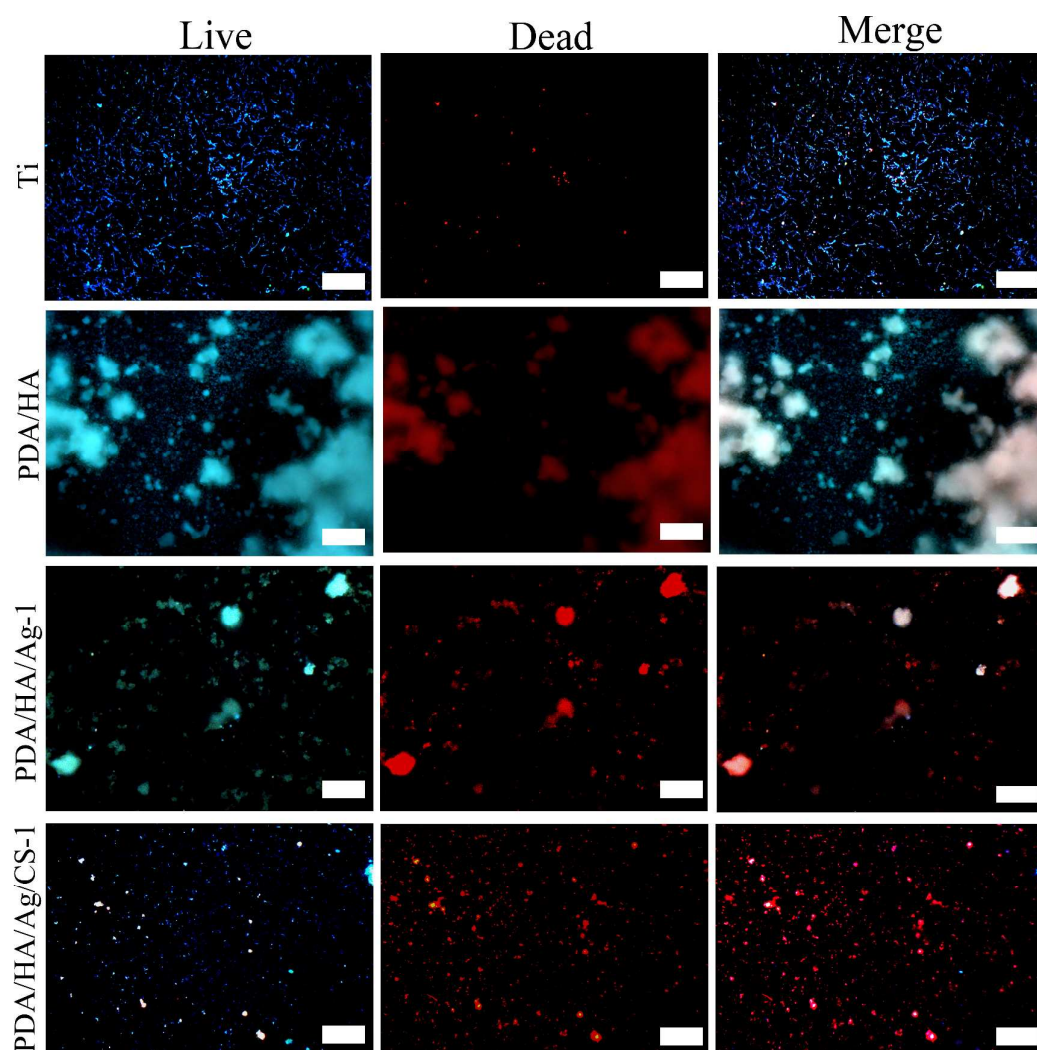

**Figure S7**

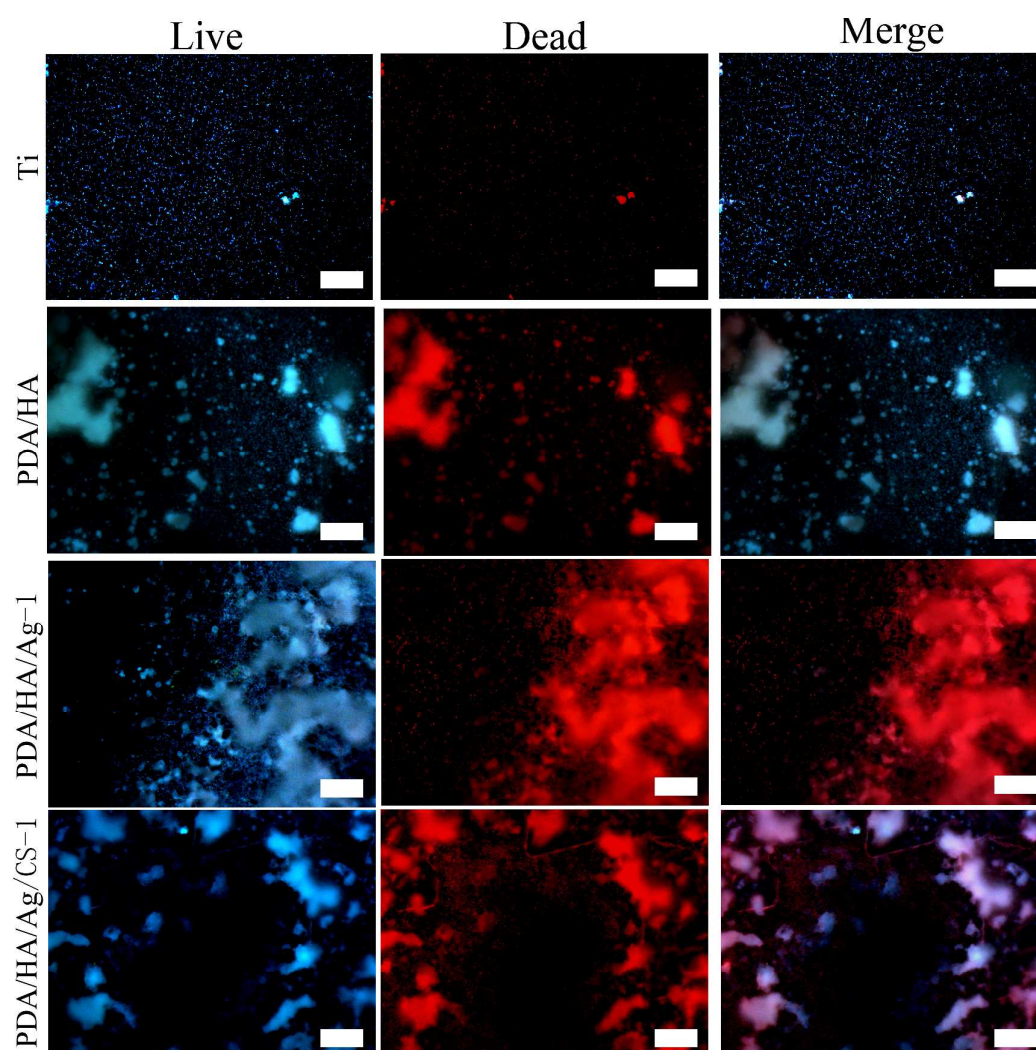

Figure S8
